# Supplementary material
Source: publisher figshare collection journal article supplement (https://acs.figshare.com/ndownloader/files/4665430)
Supplement: Supplementary file 1 [file 4665430]

  
data_so2fa 
  
_audit_creation_method            SHELXL-97 
_chemical_name_systematic 
; 
 ? 
; 
_chemical_name_common             ? 
_chemical_melting_point           ? 
_chemical_formula_moiety          ? 
_chemical_formula_sum 
 'C18 H12 F4' 
_chemical_formula_weight          304.28 
  
loop_ 
 _atom_type_symbol 
 _atom_type_description 
 _atom_type_scat_dispersion_real 
 _atom_type_scat_dispersion_imag 
 _atom_type_scat_source 
 'C'  'C'   0.0033   0.0016 
 'International Tables Vol C Tables 4.2.6.8 and 6.1.1.4' 
 'F'  'F'   0.0171   0.0103 
 'International Tables Vol C Tables 4.2.6.8 and 6.1.1.4' 
 'H'  'H'   0.0000   0.0000 
 'International Tables Vol C Tables 4.2.6.8 and 6.1.1.4' 
  
_symmetry_cell_setting            Triclinic 
_symmetry_space_group_name_H-M    P-1 
  
loop_ 
 _symmetry_equiv_pos_as_xyz 
 'x, y, z' 
 '-x, -y, -z' 
  
_cell_length_a                    6.752(3) 
_cell_length_b                    7.414(3) 
_cell_length_c                    7.515(3) 
_cell_angle_alpha                 85.677(8) 
_cell_angle_beta                  73.170(8) 
_cell_angle_gamma                 79.341(7) 
_cell_volume                      353.8(3) 
_cell_formula_units_Z             1 
_cell_measurement_temperature     183(2) 
_cell_measurement_reflns_used     900
_cell_measurement_theta_min       2.298 
_cell_measurement_theta_max      28.117
  
_exptl_crystal_description        rectangular
_exptl_crystal_colour             'yellow'
_exptl_crystal_size_max           0.30 
_exptl_crystal_size_mid           0.10 
_exptl_crystal_size_min           0.10 
_exptl_crystal_density_meas      ?
_exptl_crystal_density_diffrn     1.428 
_exptl_crystal_density_method     'not measured' 
_exptl_crystal_F_000              156 
_exptl_absorpt_coefficient_mu     0.119 
_exptl_absorpt_correction_type   multi-scan
_exptl_absorpt_correction_T_min   0.9652 
_exptl_absorpt_correction_T_max   0.9882 
_exptl_absorpt_process_details    sadabs
  
_exptl_special_details 
; 
 ? 
; 
  
_diffrn_ambient_temperature       183(2) 
_diffrn_radiation_wavelength      0.71069 
_diffrn_radiation_type            MoK\a 
_diffrn_radiation_source          'rotating unit' 
_diffrn_radiation_monochromator   graphite 
_diffrn_measurement_device_type   'CCD area detector' 
_diffrn_measurement_method        'phi and omega scans' 
_diffrn_detector_area_resol_mean  8.366 
_diffrn_standards_number         17
_diffrn_standards_interval_count  ? 
_diffrn_standards_interval_time   1024
_diffrn_standards_decay_%        0.0
_diffrn_reflns_number             1904 
_diffrn_reflns_av_R_equivalents   0.0170 
_diffrn_reflns_av_sigmaI/netI     0.0367 
_diffrn_reflns_limit_h_min        -8 
_diffrn_reflns_limit_h_max        8 
_diffrn_reflns_limit_k_min        -9 
_diffrn_reflns_limit_k_max        9 
_diffrn_reflns_limit_l_min        -4 
_diffrn_reflns_limit_l_max        9 
_diffrn_reflns_theta_min          2.80 
_diffrn_reflns_theta_max          28.06 
_reflns_number_total              1453 
_reflns_number_gt                 1008 
_reflns_threshold_expression      >2sigma(I) 
  
_computing_data_collection        'Bruker SMART' 
_computing_cell_refinement        'Bruker SMART' 
_computing_data_reduction         'Bruker SAINT' 
_computing_structure_solution     'SHELXS-97 (Sheldrick, 1990)' 
_computing_structure_refinement   'SHELXL-97 (Sheldrick, 1997)' 
_computing_molecular_graphics     'Bruker SHELXTL' 
_computing_publication_material   'Bruker SHELXTL' 
  
_refine_special_details 
; 
 Refinement of F^2^ against ALL reflections.  The weighted R-factor wR and 
 goodness of fit S are based on F^2^, conventional R-factors R are based 
 on F, with F set to zero for negative F^2^. The threshold expression of 
 F^2^ > 2sigma(F^2^) is used only for calculating R-factors(gt) etc. and is 
 not relevant to the choice of reflections for refinement.  R-factors based 
 on F^2^ are statistically about twice as large as those based on F, and R- 
 factors based on ALL data will be even larger. 
; 
  
_refine_ls_structure_factor_coef  Fsqd 
_refine_ls_matrix_type            full 
_refine_ls_weighting_scheme       calc 
_refine_ls_weighting_details 
 'calc w=1/[\s^2^(Fo^2^)+(0.0874P)^2^+0.1798P] where P=(Fo^2^+2Fc^2^)/3' 
_atom_sites_solution_primary      direct 
_atom_sites_solution_secondary    difmap 
_atom_sites_solution_hydrogens    geom 
_refine_ls_hydrogen_treatment     constr
_refine_ls_extinction_method      none 
_refine_ls_extinction_coef        ? 
_refine_ls_number_reflns          1453 
_refine_ls_number_parameters      100 
_refine_ls_number_restraints      0 
_refine_ls_R_factor_all           0.0863 
_refine_ls_R_factor_gt            0.0605 
_refine_ls_wR_factor_ref          0.1844 
_refine_ls_wR_factor_gt           0.1621 
_refine_ls_goodness_of_fit_ref    1.079 
_refine_ls_restrained_S_all       1.079 
_refine_ls_shift/su_max           0.010 
_refine_ls_shift/su_mean          0.003 
  
loop_ 
 _atom_site_label 
 _atom_site_type_symbol 
 _atom_site_fract_x 
 _atom_site_fract_y 
 _atom_site_fract_z 
 _atom_site_U_iso_or_equiv 
 _atom_site_adp_type 
 _atom_site_occupancy 
 _atom_site_symmetry_multiplicity 
 _atom_site_calc_flag 
 _atom_site_refinement_flags 
 _atom_site_disorder_assembly 
 _atom_site_disorder_group 
F1 F 0.7596(3) 0.0159(2) 0.5552(2) 0.0602(6) Uani 1 1 d . . . 
F2 F 0.8203(2) 0.5906(2) 0.7298(3) 0.0585(6) Uani 1 1 d . . . 
C1 C 0.3607(4) 0.4000(3) 0.7485(3) 0.0380(6) Uani 1 1 d . . . 
H1 H 0.2119 0.4315 0.7856 0.046 Uiso 1 1 calc R . . 
C2 C 0.4520(4) 0.2288(3) 0.6763(4) 0.0435(6) Uani 1 1 d . . . 
H2 H 0.3682 0.1433 0.6640 0.052 Uiso 1 1 calc R . . 
C3 C 0.6681(4) 0.1854(3) 0.6226(4) 0.0409(6) Uani 1 1 d . . . 
C4 C 0.7950(4) 0.3041(3) 0.6377(3) 0.0404(6) Uani 1 1 d . . . 
H4 H 0.9437 0.2718 0.5994 0.048 Uiso 1 1 calc R . . 
C5 C 0.6965(4) 0.4725(3) 0.7109(3) 0.0367(6) Uani 1 1 d . . . 
C6 C 0.4795(4) 0.5285(3) 0.7689(3) 0.0321(6) Uani 1 1 d . . . 
C7 C 0.3878(4) 0.7083(3) 0.8516(3) 0.0354(6) Uani 1 1 d . . . 
H7 H 0.4807 0.7752 0.8814 0.042 Uiso 1 1 calc R . . 
C8 C 0.1857(4) 0.7875(3) 0.8892(3) 0.0354(6) Uani 1 1 d . . . 
H8 H 0.0925 0.7262 0.8527 0.042 Uiso 1 1 calc R . . 
C9 C 0.1012(4) 0.9591(3) 0.9811(3) 0.0366(6) Uani 1 1 d . . . 
H9 H 0.1949 1.0195 1.0181 0.044 Uiso 1 1 calc R . . 
  
loop_ 
 _atom_site_aniso_label 
 _atom_site_aniso_U_11 
 _atom_site_aniso_U_22 
 _atom_site_aniso_U_33 
 _atom_site_aniso_U_23 
 _atom_site_aniso_U_13 
 _atom_site_aniso_U_12 
F1 0.0637(11) 0.0377(9) 0.0705(12) -0.0239(8) -0.0148(9) 0.0155(7) 
F2 0.0323(8) 0.0495(10) 0.0891(14) -0.0194(9) -0.0079(8) -0.0033(7) 
C1 0.0322(12) 0.0373(13) 0.0406(14) -0.0056(11) -0.0081(10) 0.0026(10) 
C2 0.0453(15) 0.0368(13) 0.0474(16) -0.0073(11) -0.0119(12) -0.0033(11) 
C3 0.0478(14) 0.0306(12) 0.0380(14) -0.0069(10) -0.0097(11) 0.0082(10) 
C4 0.0316(12) 0.0417(14) 0.0385(14) -0.0012(11) -0.0048(10) 0.0089(10) 
C5 0.0330(13) 0.0331(12) 0.0401(14) -0.0048(10) -0.0073(10) 0.0006(9) 
C6 0.0323(12) 0.0304(11) 0.0288(12) -0.0015(9) -0.0068(10) 0.0039(9) 
C7 0.0331(12) 0.0311(12) 0.0381(14) -0.0051(10) -0.0079(10) 0.0026(9) 
C8 0.0335(12) 0.0338(12) 0.0347(13) -0.0036(10) -0.0079(10) 0.0029(9) 
C9 0.0357(13) 0.0326(12) 0.0366(14) -0.0045(10) -0.0076(10) 0.0035(9) 
  
_geom_special_details 
; 
 All esds (except the esd in the dihedral angle between two l.s. planes) 
 are estimated using the full covariance matrix.  The cell esds are taken 
 into account individually in the estimation of esds in distances, angles 
 and torsion angles; correlations between esds in cell parameters are only 
 used when they are defined by crystal symmetry.  An approximate (isotropic) 
 treatment of cell esds is used for estimating esds involving l.s. planes. 
; 
  
loop_ 
 _geom_bond_atom_site_label_1 
 _geom_bond_atom_site_label_2 
 _geom_bond_distance 
 _geom_bond_site_symmetry_2 
 _geom_bond_publ_flag 
F1 C3 1.358(3) . ? 
F2 C5 1.358(3) . ? 
C1 C2 1.380(3) . ? 
C1 C6 1.396(3) . ? 
C1 H1 0.9500 . ? 
C2 C3 1.379(4) . ? 
C2 H2 0.9500 . ? 
C3 C4 1.368(4) . ? 
C4 C5 1.374(3) . ? 
C4 H4 0.9500 . ? 
C5 C6 1.393(3) . ? 
C6 C7 1.464(3) . ? 
C7 C8 1.339(3) . ? 
C7 H7 0.9500 . ? 
C8 C9 1.435(3) . ? 
C8 H8 0.9500 . ? 
C9 C9 1.345(5) 2_577 ? 
C9 H9 0.9500 . ? 
  
loop_ 
 _geom_angle_atom_site_label_1 
 _geom_angle_atom_site_label_2 
 _geom_angle_atom_site_label_3 
 _geom_angle 
 _geom_angle_site_symmetry_1 
 _geom_angle_site_symmetry_3 
 _geom_angle_publ_flag 
C2 C1 C6 122.3(2) . . ? 
C2 C1 H1 118.9 . . ? 
C6 C1 H1 118.9 . . ? 
C3 C2 C1 118.2(2) . . ? 
C3 C2 H2 120.9 . . ? 
C1 C2 H2 120.9 . . ? 
F1 C3 C4 118.4(2) . . ? 
F1 C3 C2 118.7(2) . . ? 
C4 C3 C2 122.9(2) . . ? 
C3 C4 C5 116.6(2) . . ? 
C3 C4 H4 121.7 . . ? 
C5 C4 H4 121.7 . . ? 
F2 C5 C4 117.3(2) . . ? 
F2 C5 C6 118.2(2) . . ? 
C4 C5 C6 124.5(2) . . ? 
C5 C6 C1 115.5(2) . . ? 
C5 C6 C7 120.8(2) . . ? 
C1 C6 C7 123.7(2) . . ? 
C8 C7 C6 126.3(2) . . ? 
C8 C7 H7 116.9 . . ? 
C6 C7 H7 116.9 . . ? 
C7 C8 C9 124.1(2) . . ? 
C7 C8 H8 118.0 . . ? 
C9 C8 H8 118.0 . . ? 
C9 C9 C8 124.7(3) 2_577 . ? 
C9 C9 H9 117.6 2_577 . ? 
C8 C9 H9 117.6 . . ? 
  
loop_ 
 _geom_torsion_atom_site_label_1 
 _geom_torsion_atom_site_label_2 
 _geom_torsion_atom_site_label_3 
 _geom_torsion_atom_site_label_4 
 _geom_torsion 
 _geom_torsion_site_symmetry_1 
 _geom_torsion_site_symmetry_2 
 _geom_torsion_site_symmetry_3 
 _geom_torsion_site_symmetry_4 
 _geom_torsion_publ_flag 
C6 C1 C2 C3 -0.2(4) . . . . ? 
C1 C2 C3 F1 178.6(2) . . . . ? 
C1 C2 C3 C4 0.0(4) . . . . ? 
F1 C3 C4 C5 -178.4(2) . . . . ? 
C2 C3 C4 C5 0.2(4) . . . . ? 
C3 C4 C5 F2 178.9(2) . . . . ? 
C3 C4 C5 C6 -0.3(4) . . . . ? 
F2 C5 C6 C1 -179.1(2) . . . . ? 
C4 C5 C6 C1 0.1(4) . . . . ? 
F2 C5 C6 C7 -1.3(4) . . . . ? 
C4 C5 C6 C7 177.8(2) . . . . ? 
C2 C1 C6 C5 0.2(4) . . . . ? 
C2 C1 C6 C7 -177.5(2) . . . . ? 
C5 C6 C7 C8 170.4(2) . . . . ? 
C1 C6 C7 C8 -12.1(4) . . . . ? 
C6 C7 C8 C9 175.9(2) . . . . ? 
C7 C8 C9 C9 179.6(3) . . . 2_577 ? 
  
_diffrn_measured_fraction_theta_max    0.848 
_diffrn_reflns_theta_full              25.89
_diffrn_measured_fraction_theta_full   0.988
_refine_diff_density_max    0.213 
_refine_diff_density_min   -0.412 
_refine_diff_density_rms    0.068 
